# Supplementary material for: Acceptorless dehydrogenation and hydrogenation of N- and O-containing compounds on Pd3Au1(111) facets
Source: PubMed Central journal article supplement — Sci Adv. 2020 Jul 1;6(27):eabb3831. doi: 10.1126/sciadv.abb3831 (PMC7458463; doi:10.1126/sciadv.abb3831), 2020-07-01
Supplement: abb3831_SM.pdf [file abb3831_SM.pdf]

## Supplementary Materials for

### Acceptorless dehydrogenation and hydrogenation of N- and O-containing compounds on Pd<sub>3</sub>Au<sub>1</sub>(111) facets

Xinjiang Cui, Zhangjun Huang, Antoine P. van Muyden, Zhaofu Fei, Tao Wang\*, Paul J. Dyson\*

\*Corresponding author. Email: paul.dyson@epfl.ch (P.J.D.); twang86@stanford.edu (T.W.)

Published 1 July 2020, *Sci. Adv.* **6**, eabb3831 (2020)

DOI: 10.1126/sciadv.abb3831

#### **This PDF file includes:**

Supplementary Materials and Methods  
Scheme S1 and S2  
Figs. S1 to S6  
Tables S1 to S4  
NMR data

## Materials and Methods

### Catalyst characterization

Transmission electron microscopy (TEM) was performed on an FEI Talos instrument operated at 200 kV high tension. Energy-dispersive X-ray spectroscopy (EDS) mapping was used for elemental characterization. For atomic resolution spherical aberration corrected imaging, measurements were performed on an FEI Titan Themis 60-300 operated at 200 kV with an aberration-corrected electron probe in high angle annular dark field scanning transmission electron microscopy (HAADF-STEM) mode.

X-ray diffraction (XRD) patterns were recorded on a Bruker Nonius Apex II Advance X-ray diffractometer equipped with a Mo-K $\alpha$  radiation.

X-ray photoelectron spectroscopy (XPS) was recorded on a PHI Versa Probe II scanning X-ray electron spectrometer with an Al K $\alpha$  X-ray source and the curve fitting was performed using PHI Multipak software.

ICP-OES analysis was performed on a NexIon 350 (Perkin Elmer) instrument. The catalyst was placed in muffle oven to remove the carbon support and ensure all of the metal ions were exposed by heated at 600 °C for 6 h in air. After dropwise addition of nitric acid (mixture of 0.25 mL ultrapure nitric acid (65%, Merck KGaA) and 5 mL H<sub>2</sub>O), the metal is dissolved and filtered. The solid was washed with distilled water (3 x 1 mL). All the filtrate and washings are collected and combined in one volumetric flask and the total volume was adjusted to 10 mL by addition of water.

### Catalyst Recycling Experiments

Using a similar procedure general procedure for dehydrogenation and hydrogenation reactions described in the article, the catalyst was separated by centrifugation, washed with xylene and toluene and used without further reactivation or purification for the next run.

### Preparation of D-indoline

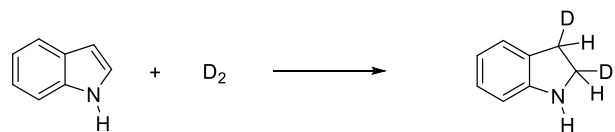

Prepared using the general hydrogenation procedure, except under D<sub>2</sub> gas (2 bar) instead of H<sub>2</sub>. <sup>1</sup>H NMR (400 MHz, CDCl<sub>3</sub>)  $\delta$  7.11 (d, 1H), 7.09 – 6.95 (m, 1H), 6.95 – 6.59 (m, 2H), 3.61 (s, 1H), 3.59 – 3.43 (m, 1H), 3.02 (d, 1H). <sup>13</sup>C NMR (101 MHz, CDCl<sub>3</sub>)  $\delta$  171.22, 127.32, 124.76, 118.86, 109.66, 77.48, 77.16, 76.85, 47.31, 29.82.

### General procedure for the dehydrogenation of D-indoline

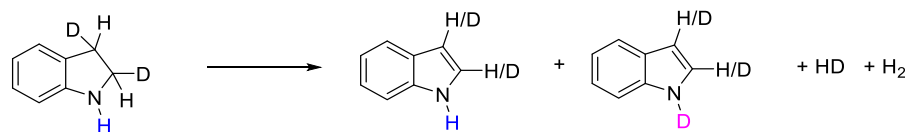

Pd<sub>3</sub>Au<sub>1</sub>/CNT (5mg), indoline (0.2 mmol) and xylene (0.4 mL) were placed in a sapphire NMR tube and charged with nitrogen. The sealed NMR tube was heated to reflux and the formation of HD and H<sub>2</sub> gas were analyzed in-situ by NMR spectroscopy. After 24h, the flask was cooled to room temperature and the product was isolated by column chromatography and characterized by NMR spectroscopy. <sup>1</sup>H NMR (400 MHz, CDCl<sub>3</sub>)  $\delta$  8.04 (s, 1H), 7.68 – 7.48 (m, 1H), 7.32 (m, .0 Hz, 1H), 7.16 – 7.01 (m, 3H), 6.49 (q, 1H). <sup>13</sup>C NMR (101 MHz, CDCl<sub>3</sub>)  $\delta$  135.89, 127.96, 124.25, 122.10, 120.85, 119.93, 111.15, 102.73

### Preparation of 1,2-dihydroquinoline

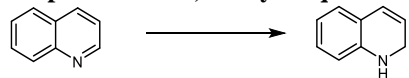

The synthesis of 1,2-dihydroquinoline was conducted using a literature procedure. A solution of quinoline (500 mg, 3.87 mmol) in dry THF (2.5 mL) was added slowly to an ice-cold suspension of lithium aluminum hydride (172 mg, 4.645 mmol) in dry THF (10 mL). The solution was stirred for 2 h at 0 °C until the conversion was complete (reaction was monitored by TLC). The reaction was then carefully quenched with ice and filtered. The filtrate was extracted with ethyl acetate (20 ml). The crude reaction product was purified by column chromatography. The product was analyzed by NMR spectroscopy. <sup>1</sup>H NMR (400 MHz, CDCl<sub>3</sub>) δ 6.85 (m, 1H), 6.73 (m, 1H), 6.49 (m, 1H), 6.28 (d, 1H), 6.21 (m, 1H), 5.64 – 5.52 (m, 1H), 4.10 (m, 2H). <sup>13</sup>C NMR (101 MHz, CDCl<sub>3</sub>) δ 144.80, 128.62, 126.78, 126.32, 121.97, 121.08, 117.84, 112.60, 77.36, 77.04, 76.72, 43.15.

### Preparation of 2-methyl-3,4-dihydroquinoline

The intermediate 2-methyl-3,4-dihydroquinoline (V in Scheme S1) was prepared according to a literature method (*Chem. Eur. J.* **23**, 14167-14172 (2017)).

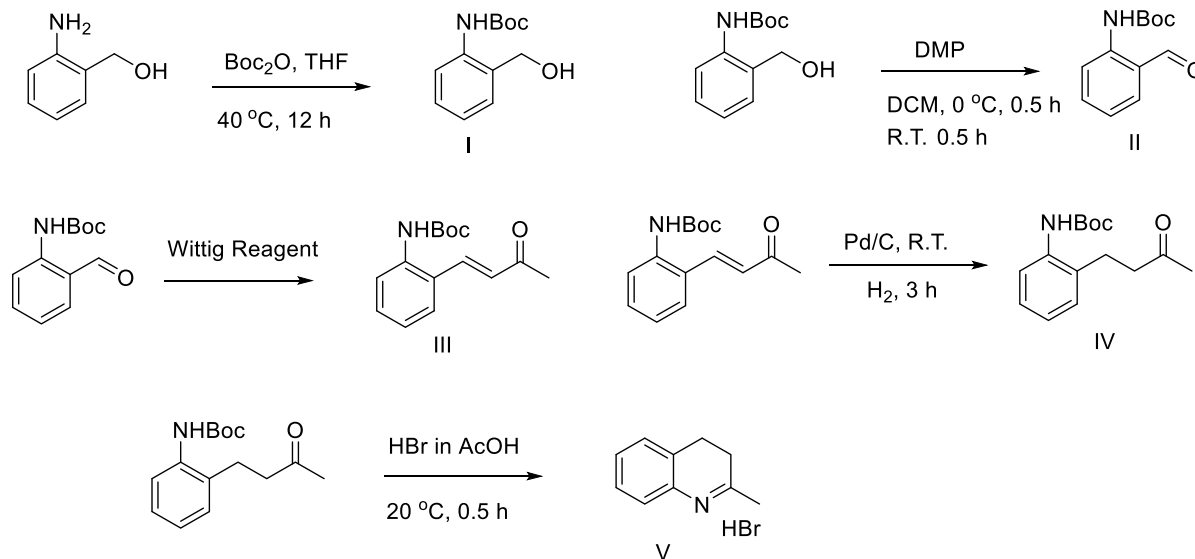

Scheme S1. Preparation of 2-methyl-3,4-dihydroquinoline.

Tert-butyl (2-(hydroxymethyl)phenyl)carbamate (I): <sup>1</sup>H NMR (400 MHz, CDCl<sub>3</sub>) δ 7.86 – 7.76 (m, 1H), 7.58 (s, 1H), 7.30 – 7.17 (m, 1H), 7.08 (m, 1H), 7.00 – 6.89 (m, 1H), 4.59 (d, *J* = 4.1 Hz, 2H), 1.44 (s, 9H). <sup>13</sup>C NMR (101 MHz, CDCl<sub>3</sub>) δ 153.58, 138.06, 129.25, 129.19, 129.08, 123.29, 121.26, 80.58, 64.34, 28.48.

Tert-butyl (2-formylphenyl)carbamate (II): <sup>1</sup>H NMR (400 MHz, CDCl<sub>3</sub>) δ 10.39 (s, 1H), 9.89 (m, 1H), 8.45 (m, 1H), 7.74 – 7.49 (m, 2H), 7.12 (m, 1H), 1.53 (s, 9H). <sup>13</sup>C NMR (101 MHz, CDCl<sub>3</sub>) δ 195.13, 152.99, 141.91, 136.18, 136.05, 121.60, 121.32, 118.34, 81.06, 28.40.

Tert-butyl (E)-2-(3-oxobut-1-en-1-yl)phenylcarbamate (III): <sup>1</sup>H NMR (400 MHz, CDCl<sub>3</sub>) δ 7.78 – 7.63 (m, 2H), 7.54 (m, 1H), 7.37 (m, 1H), 7.14 (m, 1H), 6.68 (m, 1H), 6.54 (s, 1H), 2.54 – 2.24 (m, 3H), 1.75 – 1.40 (m, 9H). <sup>13</sup>C NMR (101 MHz, CDCl<sub>3</sub>) δ 198.13, 153.24, 138.11, 136.94, 131.10, 128.62, 127.29, 124.95, 123.69, 81.23, 77.48, 77.16, 76.84, 28.40.

Tert-butyl (2-(3-oxobutyl)phenyl)carbamate (IV): <sup>1</sup>H NMR (400 MHz, CDCl<sub>3</sub>) δ 8.15 – 6.81 (m, 5H), 3.08 – 2.68 (m, 4H), 2.06 (s, 3H), 1.46 (s, 9H). <sup>13</sup>C NMR (101 MHz, CDCl<sub>3</sub>) δ 209.08, 131.83, 129.42, 126.96, 124.19, 123.27, 80.05, 44.60, 29.98, 28.43, 24.08.

2-Methyl-3,4-dihydroquinolinehydrobromide (V): <sup>1</sup>H NMR (400 MHz, CDCl<sub>3</sub>) δ 7.58 – 7.32 (m, 5H), 3.08 (m, 4H), 2.73 – 2.63 (m, 3H). <sup>13</sup>C NMR (101 MHz, CDCl<sub>3</sub>) δ 190.13, 134.45, 133.26, 131.48, 130.60, 129.40, 122.60, 26.49, 22.64, 22.55.

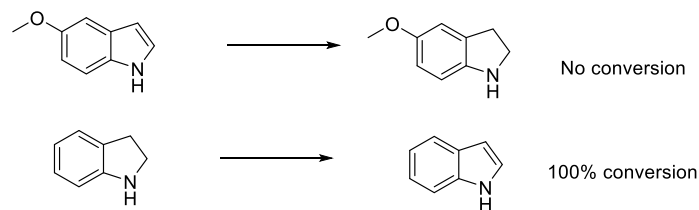

Scheme S2. Conversion of indoline using 5-methoxyindole as a hydrogen acceptor. Full conversion of indoline without any hydrogenated 5-methoxyindoline was achieved, indicating that the released hydrogen does not re-reduce the product and implying that the N-D bond shown in Figure 3c is formed by tautomerization rather than the hydrogenation of the C=N in the presence of released HD.

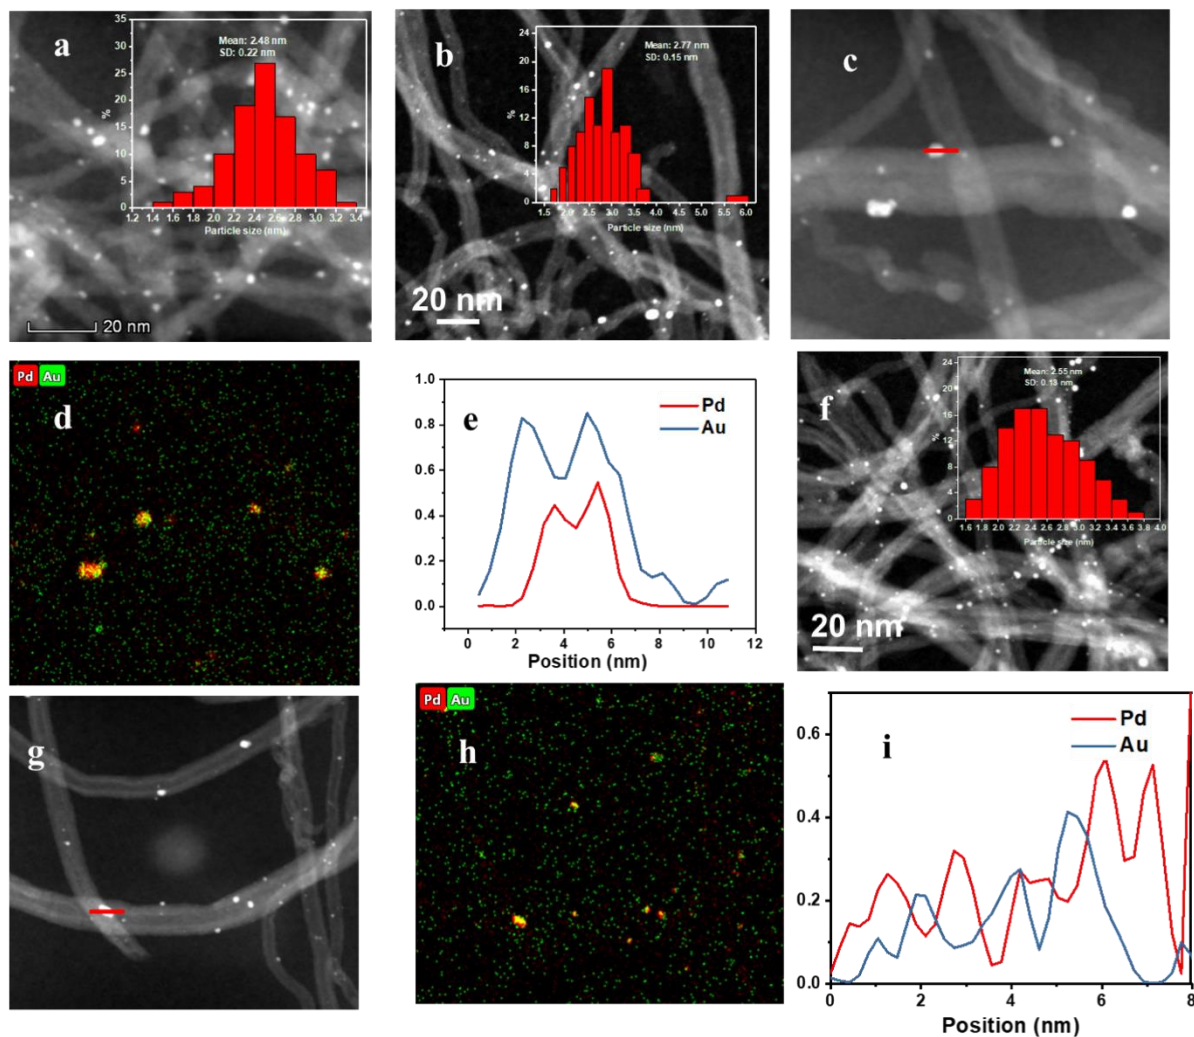

**Fig. S1. TEM characterization of the Pd<sub>3</sub>Au<sub>1</sub>/CNT, Pd<sub>1</sub>Au<sub>1</sub>/CNT and Pd<sub>1</sub>Au<sub>3</sub>/CNT catalysts.** (a) HAADF-STEM image of the PdAu/CNT catalyst. For Pd<sub>1</sub>Au<sub>1</sub>/CNT, (b) and (c) HAADF-STEM image; (d) HAADF-TEM-EDS mapping images of Au and Pd and (e) crossline profiles of elemental composition of the AuPd NP. For Pd<sub>1</sub>Au<sub>3</sub>/CNT, (f) and (g) HAADF-STEM image; (h) HAADF-TEM-EDS mapping images of Au and Pd, (i) crossline profiles of elemental composition of the AuPd NP and (I) XRD analysis.

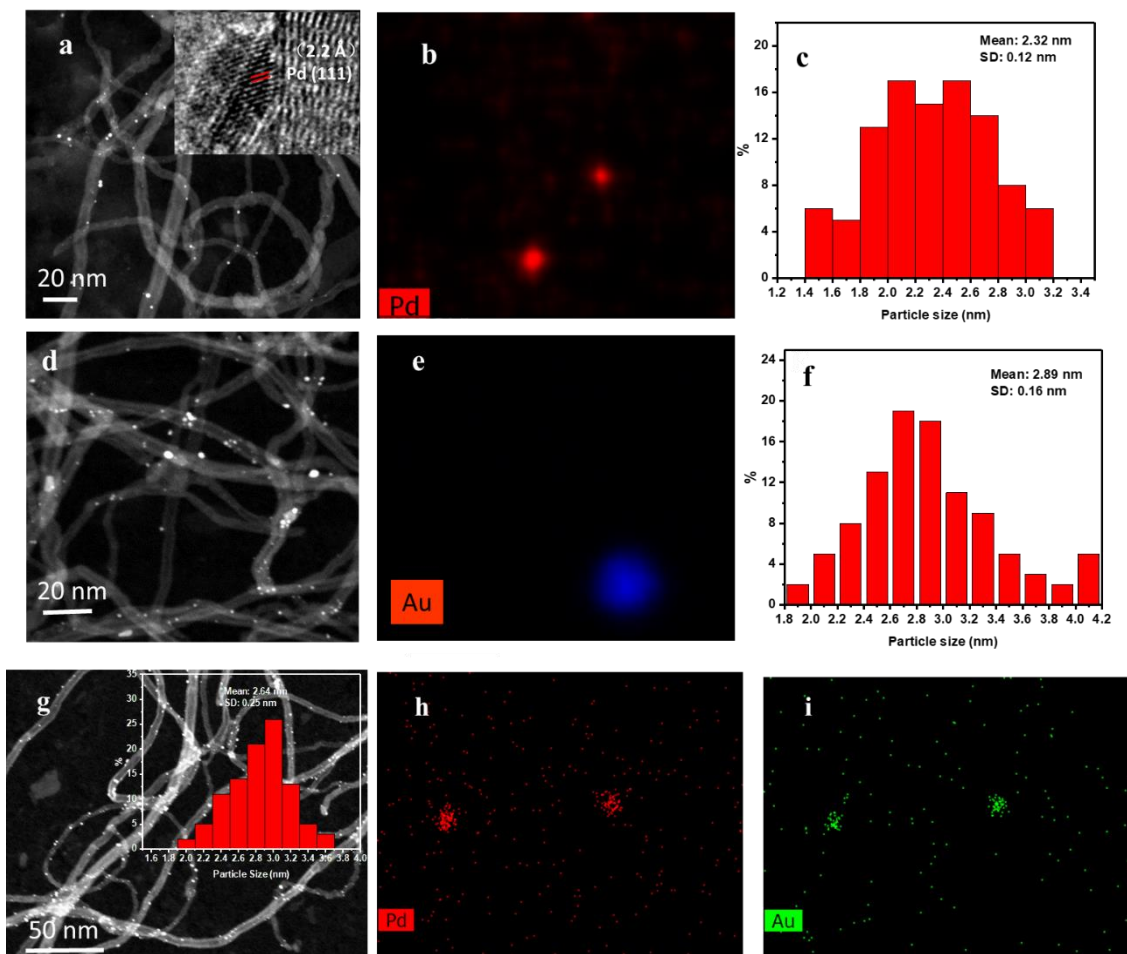

**Fig. S2. TEM characterization of the Pd/CNT, Au/CNT and used Pd<sub>3</sub>Au<sub>1</sub>/CNT catalysts.** For Pd/CNT, (a) HAADF-STEM image; (b) TEM-EDS mapping images of Pd and (c) size distribution. And characterization of the Au/CNT catalyst: (d) HAADF-STEM image; (e) HAADF-TEM-EDS mapping images of Au and (f) size distribution. Characterization Pd<sub>3</sub>Au<sub>1</sub>/CNT catalyst after use: (g) HAADF-STEM images; HAADF-TEM-EDS mapping images of Pd (h) and Au (i).

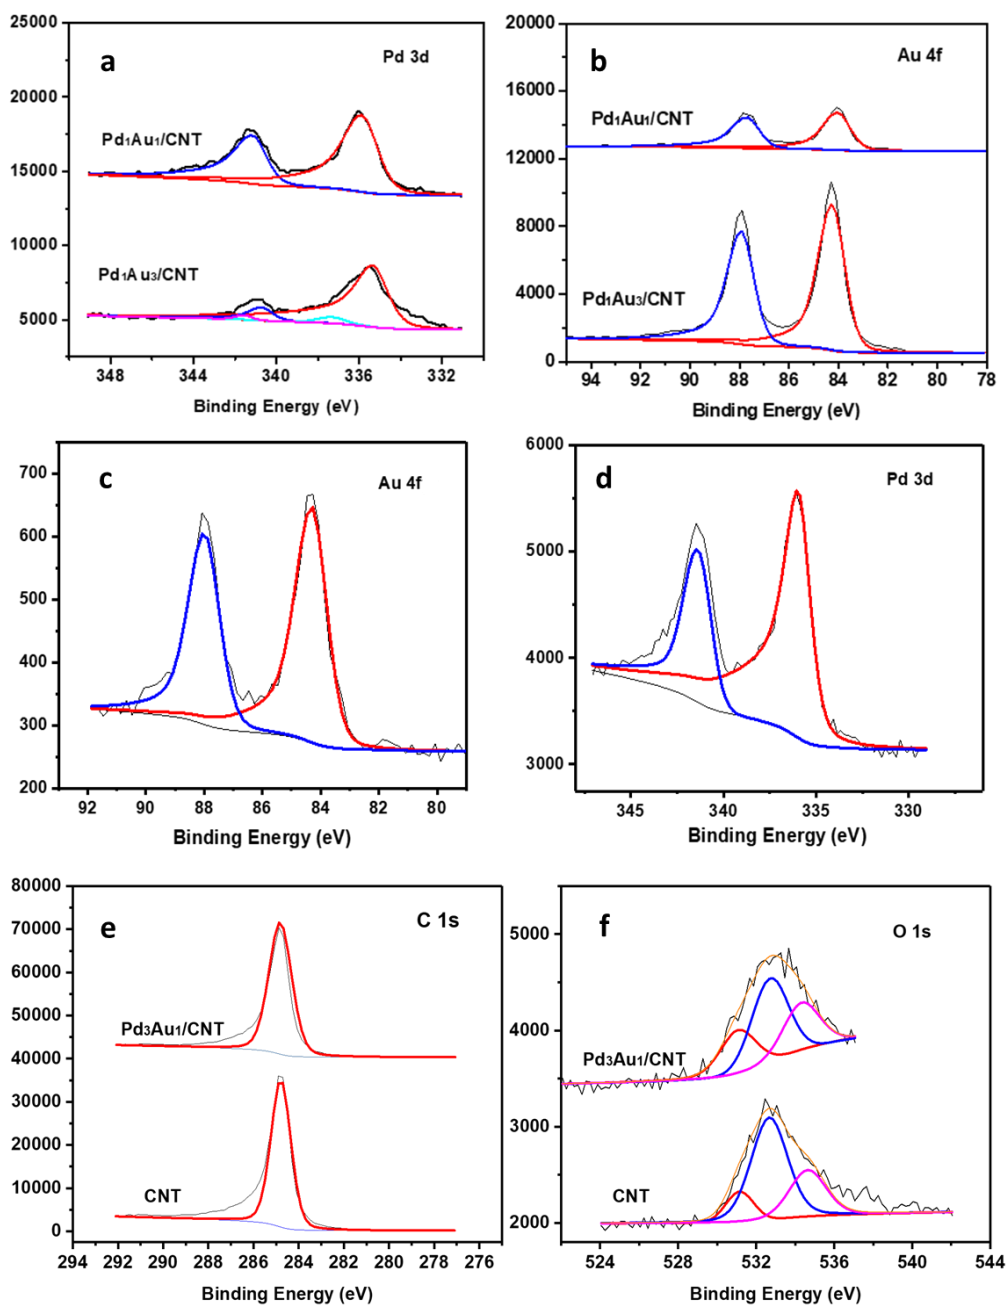

**Fig. S3. XPS characterization of the catalysts.** Pd 3d (a) spectra and Au 4f (b) spectra of the  $\text{Pd}_1\text{Au}_3/\text{CNT}$  and  $\text{Pd}_1\text{Au}_1/\text{CNT}$  catalysts. XPS of Au 4f spectra (c) and Pd 3d (d) spectra of the  $\text{Pd}_3\text{Au}_1/\text{CNT}$  after use. XPS of C 1s (e) and O 1s (f) spectra of  $\text{Pd}_3\text{Au}_1/\text{CNT}$  and CNT.

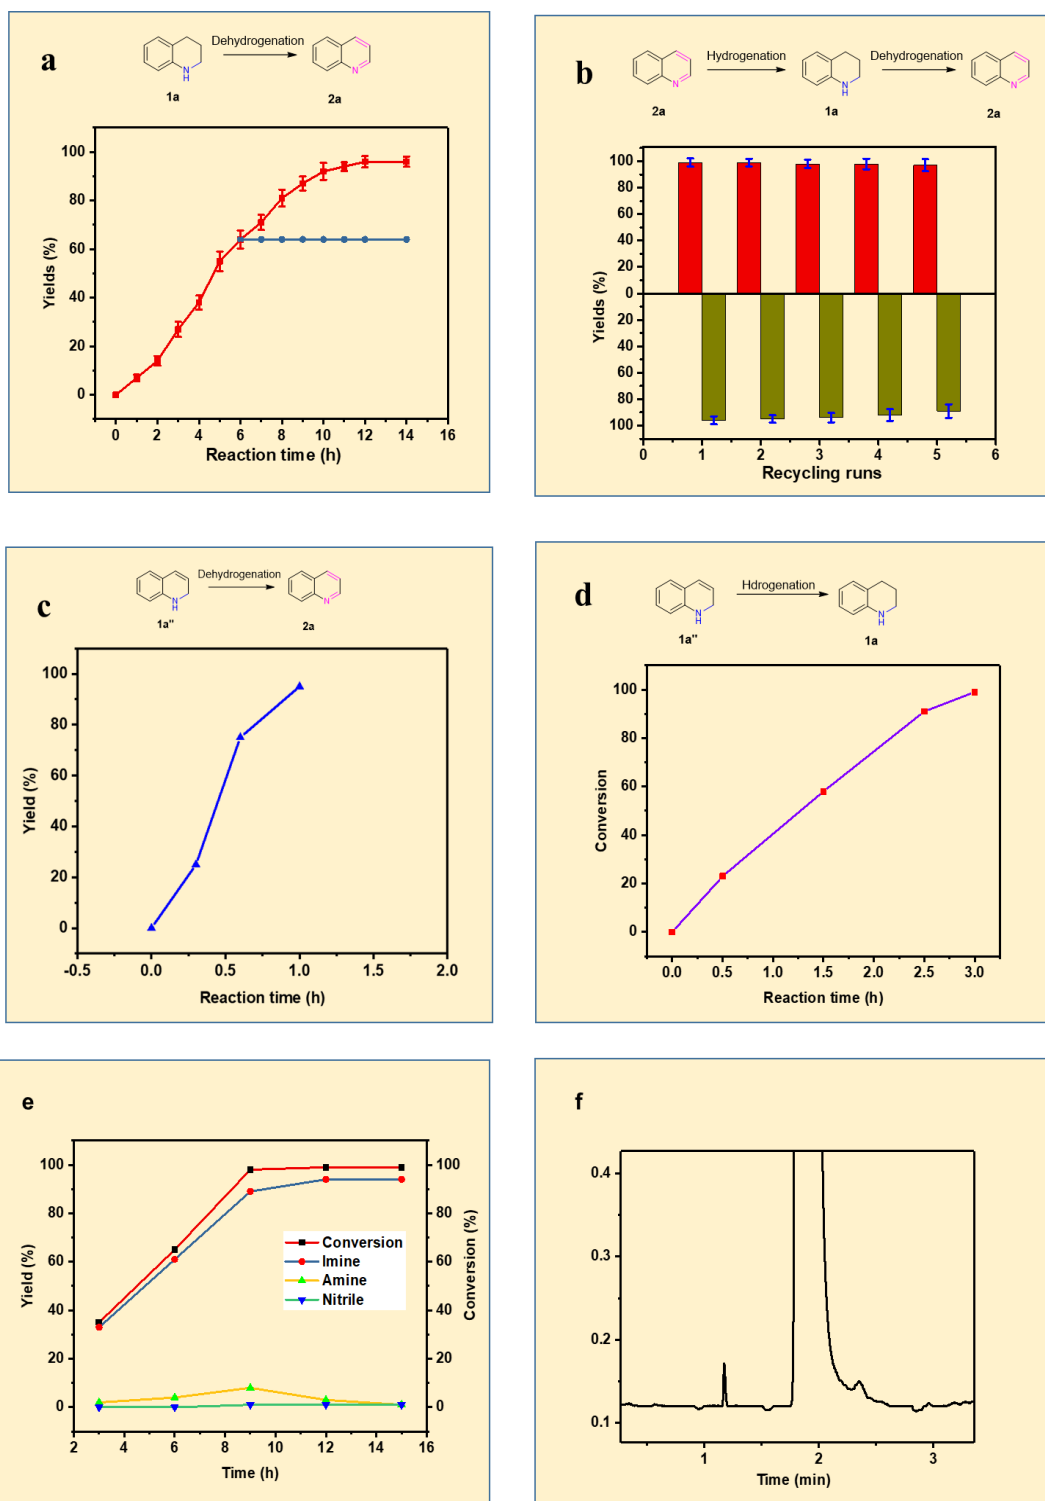

**Fig. S4. Control experiments using the Pd<sub>3</sub>Au<sub>1</sub>/CNT catalyst.** (a) Kinetic curves of the dehydrogenation reaction (red line) and the dehydrogenation reaction following the application of a hot filtration test (blue line). Reaction conditions: catalyst (0.3 mol% of metals to **1a**), **1a** (0.2 mmol), xylene (1 mL), N<sub>2</sub> atmosphere, 140 °C. (b) Interconversion between **2a** and **1a** via consecutive hydrogenation-dehydrogenation steps. Reaction conditions for the hydrogenation (red bars): catalyst (0.3 mol% of metals to **2a**), **2a** (0.2 mmol), xylene (1 mL), H<sub>2</sub> (1 bar), 80 °C, 12h. Reaction conditions for the dehydrogenation (brown bars): Pd<sub>3</sub>Au<sub>1</sub>/CNT (0.3 mol% of metals to **1a**), **1a** (0.2 mmol), xylene (1 mL), N<sub>2</sub> atmosphere, 140 °C, 12h. (c) Reaction profiles for the dehydrogenation of 1,2,-dihydroquinoline, (d) for the hydrogenation of 1,2,-dihydroquinoline by heating the mixture in xylene at 80 °C and 1 bar H<sub>2</sub>, (e) for the dehydrogenative coupling of benzylamine to form imine, amine and nitrile products. (f) Released H<sub>2</sub> detected by GC-TCD.



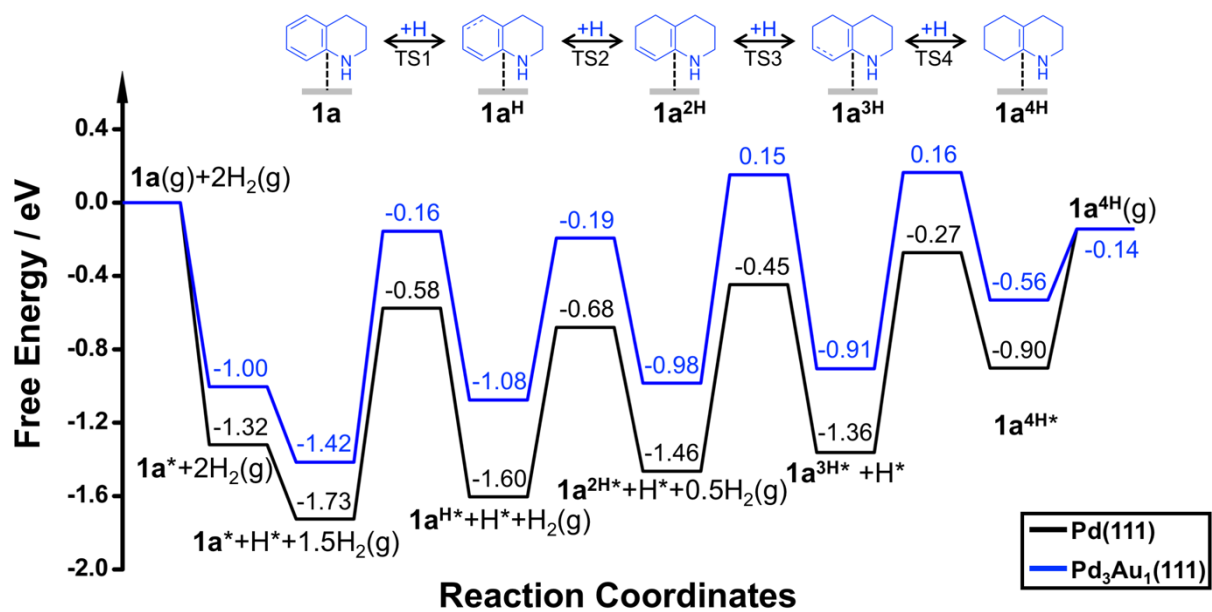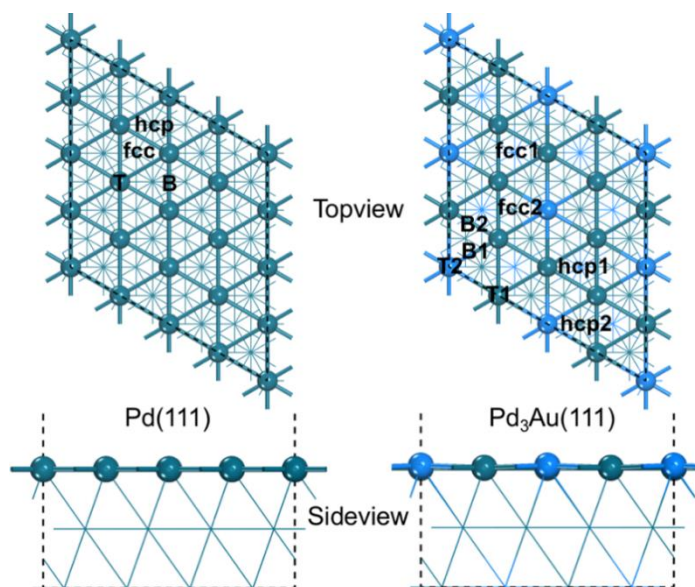

**Fig. S5. Potential free energy diagrams for the deep hydrogenation and surface structure. (top)** Hydrogenation of **1a** at 80 °C on the Pd(111) and Pd<sub>3</sub>Au<sub>1</sub>(111) surfaces. **(bottom)** Schematic top and side views of Pd(111) and Pd<sub>3</sub>Au<sub>1</sub>(111) surface structures.



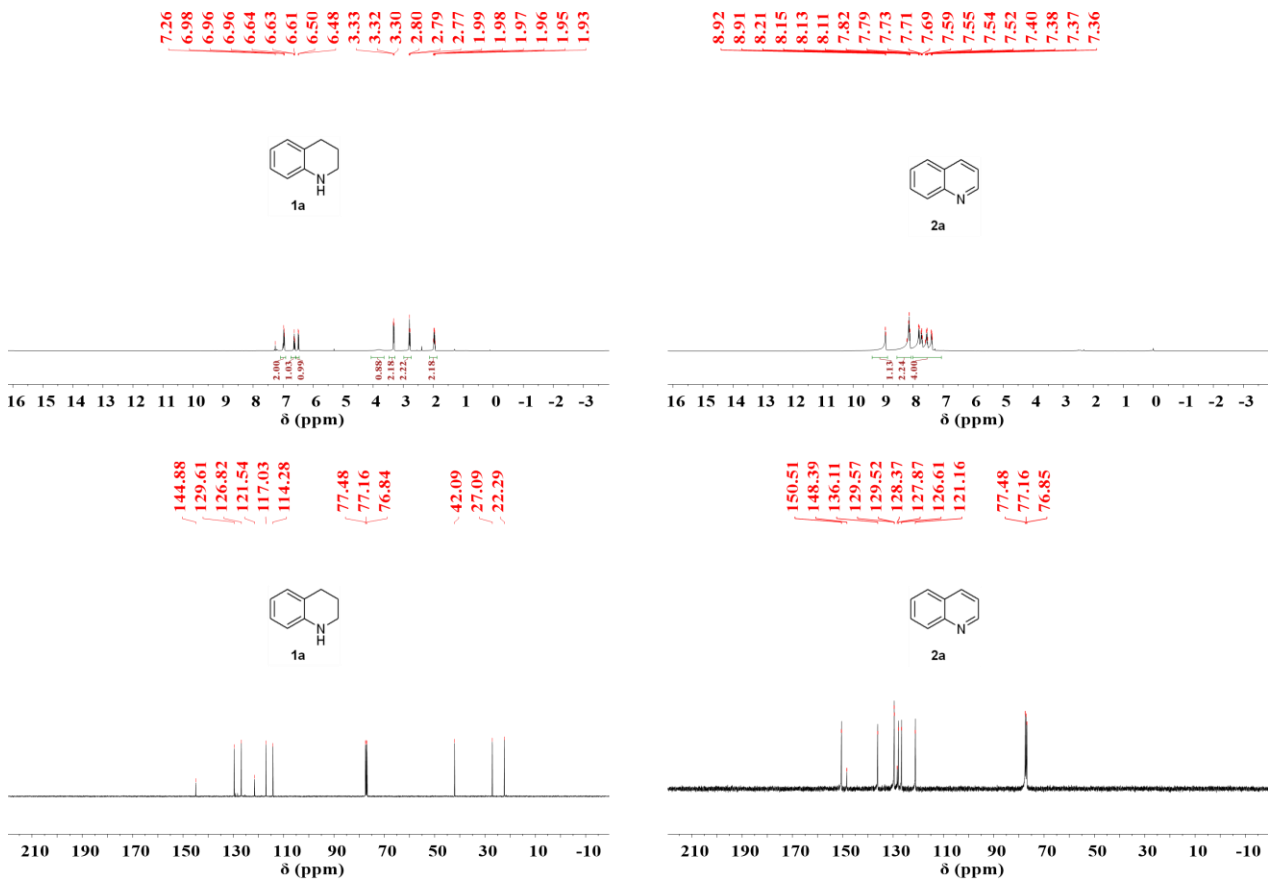

**Fig. S6.**  $^1\text{H}$  and  $^{13}\text{C}$  NMR of **1a** and **2a**.

**Table S1. Optimization of the dehydrogenation of 1,2,3,4-tetrahydro-quinoline.** Reaction conditions: catalysts (5 mg, 0.3 mol% of Pd and Au to **2a** for entry 4), substrate (0.2 mmol), solvent (1.0 ml), N<sub>2</sub>, 140 °C, 0.3 mol% of Pd to **1a** was used in entries 7-12. GC yield. TON = mol product/mol Pd and Au. TOF = TON/reaction time. TON and TOF in entries 2-6 and 13-17 were calculated according to the results by ICP-OES.

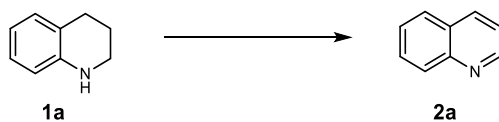

| Entry | Catalyst                                                        | Solvent | t (h) | Yield (%) | TON | TOF  |
|-------|-----------------------------------------------------------------|---------|-------|-----------|-----|------|
| 1     | CNT                                                             | Xylene  | 12    | 0         | 0   | 0    |
| 2     | Au/CNT                                                          | Xylene  | 12    | 8         | 30  | 2.5  |
| 3     | Pd/CNT                                                          | Xylene  | 12    | 30        | 66  | 5.5  |
| 4     | Pd <sub>3</sub> Au <sub>1</sub> /CNT                            | Xylene  | 12    | 96        | 321 | 26.8 |
| 5     | Pd <sub>1</sub> Au <sub>1</sub> /CNT                            | Xylene  | 12    | 91        | 309 | 25.7 |
| 6     | Pd <sub>1</sub> Au <sub>3</sub> /CNT                            | Xylene  | 12    | 83        | 278 | 23.2 |
| 7     | Pd/C                                                            | Xylene  | 12    | 26        | 65  | 5.4  |
| 8     | PdO                                                             | Xylene  | 12    | 18        | 45  | 3.7  |
| 9     | K <sub>2</sub> PdCl <sub>4</sub>                                | Xylene  | 12    | 5         | 12  | 1    |
| 10    | Pd(acac) <sub>2</sub>                                           | Xylene  | 12    | 4         | 10  | 0.8  |
| 11    | Pd(NH <sub>3</sub> ) <sub>4</sub> Cl <sub>2</sub>               | Xylene  | 12    | 8         | 20  | 1.7  |
| 12    | PdCl <sub>2</sub>                                               | Xylene  | 12    | 30        | 75  | 6.2  |
| 13    | Pd <sub>3</sub> Au <sub>1</sub> /CNT                            | Toluene | 12    | 67        | 224 | 18.7 |
| 14    | Pd <sub>3</sub> Au <sub>1</sub> /CNT                            | DMF     | 12    | 35        | 117 | 9.8  |
| 15    | Pd <sub>3</sub> Au <sub>1</sub> /CNT                            | Xylene  | 8     | 76        | 255 | 21.2 |
| 16    | Pd <sub>3</sub> Au <sub>1</sub> /C                              | Xylene  | 12    | 29        | 89  | 7.4  |
| 17    | Pd <sub>3</sub> Au <sub>1</sub> /Al <sub>2</sub> O <sub>3</sub> | Xylene  | 12    | 34        | 105 | 8.7  |

**Table S2. Benchmark hydrogenation of quinoline: variation of the reaction conditions.** Reaction conditions: catalysts (5 mg, 0.3 mol% of Pd and Au to **2a** for entry 3), substrate (0.2 mmol), xylene (0.5 ml), H<sub>2</sub> (1 bar). GC yield. TON = mol product/mol Pd and Au. TOF = TON/reaction time. TON and TOF were calculated according to the results by ICP-OES.

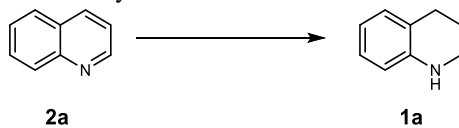

| Entry | Catalyst                                                        | T (°C) | t (h) | Yield (%)       | TON | TOF  |
|-------|-----------------------------------------------------------------|--------|-------|-----------------|-----|------|
| 1     | Au/CNT                                                          | 80     | 12    | 0               | 0   | 0    |
| 2     | Pd/CNT                                                          | 80     | 12    | 86 <sup>c</sup> | 192 | 15.9 |
| 3     | Pd <sub>3</sub> Au <sub>1</sub> /CNT                            | 80     | 12    | 99              | 351 | 29.3 |
| 4     | Pd <sub>1</sub> Au <sub>1</sub> /CNT                            | 80     | 12    | 90              | 306 | 25.5 |
| 5     | Pd <sub>1</sub> Au <sub>3</sub> /CNT                            | 80     | 12    | 82              | 330 | 27.5 |
| 6     | Pd <sub>3</sub> Au <sub>1</sub> /CNT                            | 60     | 12    | 81              | 287 | 23.9 |
| 7     | Pd <sub>3</sub> Au <sub>1</sub> /CNT                            | 80     | 8     | 89 <sup>†</sup> | 316 | 26.3 |
| 8     | Pd <sub>3</sub> Au <sub>1</sub> /CNT                            | 80     | 12    | 76 <sup>‡</sup> | 270 | 22.5 |
| 9     | Pd <sub>3</sub> Au <sub>1</sub> /C                              | 80     | 12    | 71              | 220 | 18.3 |
| 10    | Pd <sub>3</sub> Au <sub>1</sub> /Al <sub>2</sub> O <sub>3</sub> | 80     | 12    | 84              | 260 | 21.7 |

<sup>†</sup>Decahydroquinoline is the side product. <sup>‡</sup>DMF.

**Table S3. Dehydrogenation of amines and alcohols using the Pd<sub>3</sub>Au<sub>1</sub>/CNT catalyst.** Reaction conditions: Pd<sub>3</sub>Au<sub>1</sub>/CNT (0.3 mol% of metals to substrate), amines or alcohols (0.2 mmol), xylene (1 mL), N<sub>2</sub> atmosphere, 140 °C, 24 h.

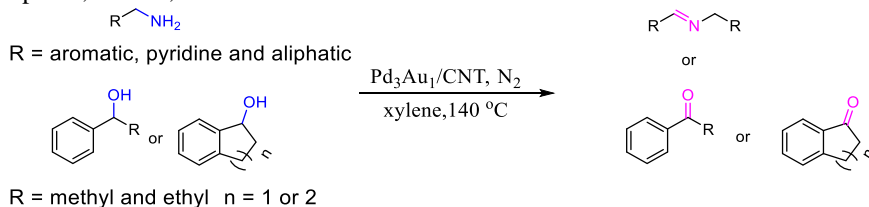

| Entry | Substrate | Product | Yield (%) <sup>†</sup> |
|-------|-----------|---------|------------------------|
| 1     | (5a)      | (4a)    | 94                     |
| 2     | (5b)      | (4f)    | 71 <sup>‡</sup>        |
| 3     | (5c)      | (4g)    | 71 <sup>‡</sup>        |
| 4     | (5d)      | (4h)    | 80 <sup>‡</sup>        |
| 5     | (5e)      | (4i)    | 93 <sup>‡</sup>        |
| 6     | (5f)      | (4j)    | 64 <sup>‡, §</sup>     |
| 7     | (5g)      | (4k)    | 99                     |
| 8     | (5h)      | (4l)    | 95                     |
| 9     | (5i)      | (4m)    | 98                     |
| 10    | (5j)      | (4n)    | 96 <sup>  </sup>       |
| 11    | (5k)      | (4o)    | 94 <sup>  </sup>       |

<sup>†</sup>Isolated yield. <sup>‡</sup>NMR yields with diphenylmethanol as standard. <sup>§</sup>Toluene used as solvent. <sup>||</sup>12h

**Table S4:** Adsorption energies of quinoline vs TOF on different catalysts and TOFs for **1a** dehydrogenation.

| Catalysts                             | Adsorption energy of <b>2a</b> (eV) | TOF (dehydrogenation) / h <sup>-1</sup> |
|---------------------------------------|-------------------------------------|-----------------------------------------|
| Pd(111)                               | -3.03                               | 5.5                                     |
| Pd <sub>3</sub> Au <sub>1</sub> (111) | -2.14                               | 26.8                                    |
| Pd <sub>1</sub> Au <sub>1</sub> (111) | -1.45                               | 25.7                                    |
| Pd <sub>1</sub> Au <sub>3</sub> (111) | -1.13                               | 23.2                                    |
| Au(111)                               | -0.91                               | 2.5                                     |

## NMR data

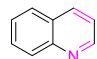

(2a)  $^1\text{H}$  NMR (400 MHz,  $\text{CDCl}_3$ )  $\delta$ = 8.93-8.91(d, 1H), 8.54-8.06 (m, 2H), 8.01-7.06 (m, 4H).  $^{13}\text{C}$  NMR (101 MHz,  $\text{CDCl}_3$ )  $\delta$  150.51, 148.39, 136.11, 129.57, 129.52, 128.37, 127.87, 126.61, 121.16.

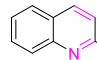

(2b)  $^1\text{H}$  NMR (400 MHz,  $\text{CDCl}_3$ )  $\delta$ = 7.95-7.92 (d, 2H), 7.75-7.53 (m, 2H), 7.41-7.36 (m, 1H), 7.20-7.16 (d, 1H), 2.66 (s, 3H).  $^{13}\text{C}$  NMR (101 MHz,  $\text{CDCl}_3$ )  $\delta$ = 159.06, 147.91, 136.30, 129.53, 128.68, 127.58, 126.57, 125.77, 122.09, 25.45.

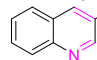

(2c)  $^1\text{H}$  NMR (400 MHz,  $\text{CDCl}_3$ )  $\delta$ = 8.79-8.74 (d, 1H), 8.10-8.04 (m, 1H), 7.92-7.89 (d, 1H), 7.82-7.41 (m, 3H), 2.51 (s, 3H).  $^{13}\text{C}$  NMR (101 MHz,  $\text{CDCl}_3$ )  $\delta$ = 152.54, 146.69, 134.76, 130.57, 129.30, 128.53, 128.24, 127.24, 126.65, 18.87.

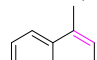

(2d)  $^1\text{H}$  NMR (400 MHz,  $\text{CDCl}_3$ )  $\delta$ = 8.79-8.75 (d, 1H), 8.13-8.09 (d, 1H), 8.01-7.96 (d, 1H), 7.73-7.69 (d, 1H), 7.58-7.54 (d, 1H), 7.39- 7.19 (m, 1H), 2.70 (s, 3H).  $^{13}\text{C}$  NMR (101 MHz,  $\text{CDCl}_3$ )  $\delta$ = 150.18, 147.96, 144.51, 130.04, 129.26, 128.38, 126.41, 123.92, 121.95, 18.77.

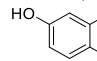

(2e)  $^1\text{H}$  NMR (400 MHz,  $\text{CDCl}_3$ )  $\delta$ = 10.00 (s, 1H), 8.67-8.63 (d, 1H), 8.15-8.12 (d, 1H), 7.87-7.84 (d, 1H), 7.38-7.33 (m, 2H), 7.17-7.12 (d, 1H).  $^{13}\text{C}$  NMR (101 MHz,  $\text{CDCl}_3$ )  $\delta$ = 155.43, 147.08, 143.00, 134.17, 130.38, 129.29, 121.94, 121.37, 108.30, 39.73, 39.52, 39.31.

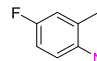

(2f)  $^1\text{H}$  NMR (400 MHz,  $\text{CDCl}_3$ )  $\delta$ = 8.87-8.24 (m, 2H), 7.71-7.00 (m, 3H), 2.66 (s, 3H).  $^{13}\text{C}$  NMR (101 MHz,  $\text{CDCl}_3$ )  $\delta$ = 135.73, 131.13, 122.90, 119.77, 119.50, 110.76, 110.55, 25.32.

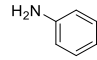

(2g)  $^1\text{H}$  NMR (400 MHz,  $\text{CDCl}_3$ )  $\delta$ = 8.59-8.55 (d, 1H), 7.85-7.81 (t, 2H), 7.49- 6.68 (m, 3H), 3.91 (s, 2H).  $^{13}\text{C}$  NMR (101 MHz,  $\text{CDCl}_3$ )  $\delta$ = 146.75, 144.81, 143.35, 134.03, 130.51, 129.93, 121.77, 121.50, 107.49.

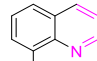

(2h)  $^1\text{H}$  NMR (400 MHz,  $\text{CDCl}_3$ )  $\delta$ = 8.89-8.84 (m, 1H), 8.05-8.01 (m, 1H), 7.59-7.54 (m, 1H), 7.49-7.44 (d, 1H), 7.38-7.26 (m, 2H), 2.75 (s, 3H).  $^{13}\text{C}$  NMR (101 MHz,  $\text{CDCl}_3$ )  $\delta$ = 149.33, 147.43, 137.16, 136.46, 129.75, 128.38, 126.42, 125.98, 120.94, 18.28.

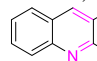

(2i)  $^1\text{H}$  NMR (400 MHz,  $\text{CDCl}_3$ )  $\delta$ = 8.77-8.72 (d, 1H), 8.26-8.22 (m, 2H), 8.06-7.95 (m, 2H), 7.79-7.76 (m, 2H), 7.55-7.51 (m, 2H).  $^{13}\text{C}$  NMR (101 MHz,  $\text{CDCl}_3$ )  $\delta$ = 149.20, 136.18, 130.42, 129.54, 128.33, 126.71, 125.81.

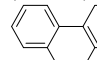

(2j)  $^1\text{H}$  NMR (400 MHz,  $\text{CDCl}_3$ )  $\delta$ = 9.17 (s, 1H), 8.66-8.54 (m, 2H), 8.26-8.18 (m, 1H), 8.12-8.01 (m, 1H), 7.89-7.83 (m, 1H), 7.82-7.61 (m, 3H).  $^{13}\text{C}$  NMR (101 MHz,  $\text{CDCl}_3$ )  $\delta$ = 153.69, 144.60, 132.69, 131.14, 130.28, 128.90, 128.82, 127.62, 127.21, 122.35, 122.00.

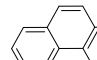

(2k)  $^1\text{H}$  NMR (400 MHz,  $\text{CDCl}_3$ )  $\delta$ = 9.29-9.20 (d, 1H), 9.09-8.85 (m, 1H), 8.19-8.14 (m, 1H), 7.95-7.88 (d, 2H), 7.85-7.74 (m, 1H), 7.78-7.65 (m, 3H), 7.59-7.49 (m, 1H).  $^{13}\text{C}$  NMR (101 MHz,  $\text{CDCl}_3$ )  $\delta$ = 148.97, 146.73, 135.95, 133.75, 131.65, 128.33, 127.95, 127.90, 127.21, 126.54, 125.48, 124.50, 121.93.

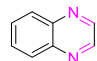

(2l)  $^1\text{H}$  NMR (400 MHz,  $\text{CDCl}_3$ )  $\delta$ = 9.06-8.71 (m, 2H), 8.25-8.03 (m, 2H), 7.92-7.67 (m, 2H).  $^{13}\text{C}$  NMR (101 MHz,  $\text{CDCl}_3$ )  $\delta$ = 144.98, 143.05, 130.05, 129.53.

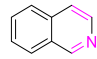

(2m)  $^1\text{H}$  NMR (400 MHz,  $\text{CDCl}_3$ )  $\delta$ = 9.29-9.18 (d, 1H), 8.58-8.47 (m, 1H), 7.99-7.85 (m, 1H), 7.76-7.89 (m, 1H), 7.74-7.50 (m, 3H).  $^{13}\text{C}$  NMR (101 MHz,  $\text{CDCl}_3$ )  $\delta$ = 152.56, 143.05, 135.76, 130.31, 128.68, 127.61, 127.22, 126.46, 120.44.

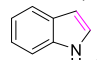

(2n)  $^1\text{H}$  NMR (400 MHz,  $\text{CDCl}_3$ )  $\delta$ = 8.01 (s, 1H), 7.68-7.53 (m, 1H), 7.41-7.28 (m, 1H), 7.25- 7.08 (m, 2H), 7.08-7.00 (m, 1H), 6.58-6.39 (m, 1H).  $^{13}\text{C}$  NMR (101 MHz,  $\text{CDCl}_3$ )  $\delta$ = 135.90, 127.97, 124.24, 122.12, 120.86, 119.94, 111.14, 102.76.

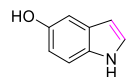

**(2o)**  $^1\text{H}$  NMR (400 MHz,  $\text{CDCl}_3$ )  $\delta$ = 8.01-7.89 (s, 1H), 7.23-7.08 (m, 2H), 7.08-6.83 (m, 1H), 6.78-6.57 (m, 1H), 6.36 (s, 1H), 4.46 (s, 1H).  $^{13}\text{C}$  NMR (101 MHz,  $\text{CDCl}_3$ )  $\delta$ = 149.65, 131.31, 128.72, 125.39, 111.94, 111.76, 105.21, 102.20.

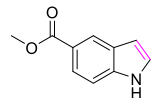

**(2p)**  $^1\text{H}$  NMR (400 MHz,  $\text{CDCl}_3$ )  $\delta$ = 8.47 (s, 1H), 8.35 (s, 1H), 7.93-7.71 (m, 1H), 7.54-7.09 (m, 2H), 6.57 (s, 1H), 3.86 (s, 3H).  $^{13}\text{C}$  NMR (101 MHz,  $\text{CDCl}_3$ )  $\delta$ = 138.55, 127.59, 125.69, 123.91, 123.47, 121.99, 110.89, 104.11, 52.02.

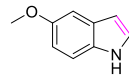

**(2q)**  $^1\text{H}$  NMR (400 MHz,  $\text{CDCl}_3$ )  $\delta$ = 8.00 (s, 1H), 7.58-6.61 (m, 4H), 6.57-6.08 (m, 1H), 3.77 (s, 3H).  $^{13}\text{C}$  NMR (101 MHz,  $\text{CDCl}_3$ )  $\delta$ = 154.29, 131.09, 128.41, 125.01, 112.44, 111.84, 102.45, 55.98.

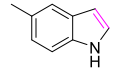

**(2r)**  $^1\text{H}$  NMR (400 MHz,  $\text{CDCl}_3$ )  $\delta$ = 7.73 (s, 1H), 7.63-7.31 (m, 1H), 7.33-7.11 (m, 1H), 7.11-6.94 (m, 2H), 6.01-6.29 (m, 1H), 2.35 (s, 3H).  $^{13}\text{C}$  NMR (101 MHz,  $\text{CDCl}_3$ )  $\delta$ = 136.16, 135.15, 129.19, 121.04, 119.74, 110.31, 100.51, 13.84.

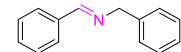

**(4a)**  $^1\text{H}$  NMR (400 MHz,  $\text{CDCl}_3$ )  $\delta$ = 8.33 (s, 1H), 7.77-7.62 (m, 2H), 7.43-7.24 (m, 8H), 4.65 (s, 2H).  $^{13}\text{C}$  NMR (101 MHz,  $\text{CDCl}_3$ )  $\delta$ = 162.15, 139.41, 136.28, 130.91, 128.74, 128.63, 128.41, 128.12, 127.12, 65.19.

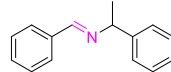

**(4b)**  $^1\text{H}$  NMR (400 MHz,  $\text{CDCl}_3$ )  $\delta$ = 8.37 (s, 1H), 7.87-7.74 (m, 2H), 7.49-7.37 (m, 5H), 7.53-7.23 (m, 2H), 7.28-7.19 (m, 1H), 4.64-4.35 (m, 1H), 1.69-1.45 (m, 3H).  $^{13}\text{C}$  NMR (101 MHz,  $\text{CDCl}_3$ )  $\delta$ = 159.56, 145.34, 136.56, 130.69, 128.66, 128.55, 128.39, 126.95, 126.76, 69.87, 25.01.

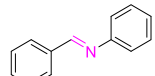

**(4c)**  $^1\text{H}$  NMR (400 MHz,  $\text{CDCl}_3$ )  $\delta$ = 8.39 (s, 1H), 7.98-7.71 (m, 2H), 7.46-7.24 (m, 5H), 7.20-7.00 (m, 3H).  $^{13}\text{C}$  NMR (101 MHz,  $\text{CDCl}_3$ )  $\delta$ = 160.56, 152.22, 136.35, 131.52, 129.29, 128.95, 128.91, 126.07, 121.00.

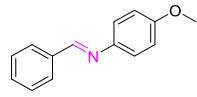

**(4d)**  $^1\text{H}$  NMR (400 MHz,  $\text{CDCl}_3$ )  $\delta$ = 8.39 (m, 1H), 8.14-7.78 (m, 2H), 7.58-7.35 (m, 3H), 7.27-7.39 (d, 2H), 7.07-6.80 (m, 2H), 3.77 (s, 3H).  $^{13}\text{C}$  NMR (101 MHz,  $\text{CDCl}_3$ )  $\delta$ = 158.57, 131.20, 128.88, 128.75, 122.34, 114.53, 55.65.

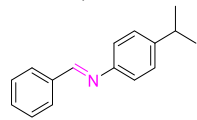

**(4e)**  $^1\text{H}$  NMR (400 MHz,  $\text{CDCl}_3$ )  $\delta$ = 8.39 (s, 1H), 7.95-7.68 (m, 2H), 7.49-7.24 (m, 3H), 7.24-7.05 (m, 4H), 2.96-2.71 (m, 1H), 1.29-1.02 (m, 6H).  $^{13}\text{C}$  NMR (101 MHz,  $\text{CDCl}_3$ )  $\delta$ = 159.64, 149.75, 146.87, 136.40, 131.22, 128.76, 127.14, 120.88, 33.75, 24.11.

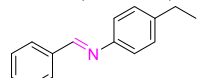

**(4f)**  $^1\text{H}$  NMR (400 MHz,  $\text{CDCl}_3$ )  $\delta$ = 8.40 (s, 1H), 7.92 (s, 2H), 7.83-7.11 (m, 5H), 7.09-6.84 (m, 1H), 3.11-2.64 (m, 2H), 1.59-0.85 (m, 3H).  $^{13}\text{C}$  NMR (101 MHz,  $\text{CDCl}_3$ )  $\delta$ = 159.34, 131.20, 128.77, 128.66, 126.76, 125.90, 117.71, 24.84, 14.96.

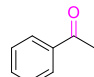

**(4k)**  $^1\text{H}$  NMR (400 MHz,  $\text{CDCl}_3$ )  $\delta$ = 7.31-7.22 (m, 5H), 7.22-7.13 (m, 1H), 3.73 (s, 3H).  $^{13}\text{C}$  NMR (101 MHz,  $\text{CDCl}_3$ )  $\delta$ = 140.41, 128.53, 128.29, 127.08, 77.48, 77.16, 76.85, 53.29.

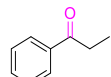

**(4l)**  $^1\text{H}$  NMR (400 MHz,  $\text{CDCl}_3$ )  $\delta$ = 7.94-7.81 (m, 2H), 7.66-7.31 (m, 1H), 7.49-7.21 (m, 2H), 3.10-2.79 (m, 2H), 1.25-1.04 (m, 3H).  $^{13}\text{C}$  NMR (101 MHz,  $\text{CDCl}_3$ )  $\delta$ = 200.94, 137.03, 132.98, 128.66, 128.08, 31.90, 8.36.

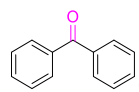

**(4m)**  $^1\text{H NMR}$  (400 MHz,  $\text{CDCl}_3$ )  $\delta$ = 7.92-7.68 (m, 4H), 7.56-7.48 (m, 2H), 7.48-7.32 (m, 4H).  $^{13}\text{C NMR}$  (101 MHz,  $\text{CDCl}_3$ )  $\delta$ = 196.85, 137.71, 132.53, 130.17, 128.39.

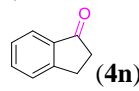

**(4n)**  $^1\text{H NMR}$  (400 MHz,  $\text{CDCl}_3$ )  $\delta$ = 7.87-7.51 (m, 1H), 7.70-7.38 (m, 1H), 7.60-7.31 (m, 1H), 7.32-7.24 (m, 1H), 3.15-3.02 (m, 2H), 2.65-2.54 (m, 2H).  $^{13}\text{C NMR}$  (101 MHz,  $\text{CDCl}_3$ )  $\delta$ = 207.13, 155.24, 137.16, 134.67, 127.35, 126.79, 123.77, 36.30, 25.89.

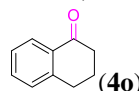

**(4o)**  $^1\text{H NMR}$  (400 MHz,  $\text{CDCl}_3$ )  $\delta$ = 8.10-7.81 (m, 1H), 7.58-7.21 (m, 1H), 7.32-7.03 (m, 2H), 2.99-2.81 (m, 2H), 2.76-2.50 (m, 2H), 2.26-1.95 (m, 2H).  $^{13}\text{C NMR}$  (101 MHz,  $\text{CDCl}_3$ )  $\delta$ = 198.50, 144.58, 133.47, 132.67, 128.85, 127.23, 126.69, 39.24, 29.79, 23.37.

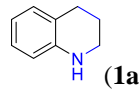

**(1a)**  $^1\text{H NMR}$  (400 MHz,  $\text{CDCl}_3$ )  $\delta$ = 7.09-6.91 (m, 2H), 6.83-6.51 (m, 1H), 6.69-6.37 (m, 1H), 3.81 (s, 1H), 3.47-3.28 (m, 2H), 2.99-2.67 (m, 2H), 2.12-1.87 (m, 2H).  $^{13}\text{C NMR}$  (101 MHz,  $\text{CDCl}_3$ )  $\delta$ = 144.88, 129.61, 126.82, 121.54, 117.03, 114.28, 42.09, 27.09, 22.29.

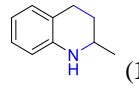

**(1b)**  $^1\text{H NMR}$  (400 MHz,  $\text{CDCl}_3$ )  $\delta$ = 7.14-6.87 (m, 2H), 6.76-6.39 (m, 2H), 3.67 (s, 1H), 3.61-3.21 (m, 1H), 3.13-2.61 (m, 3H), 2.05-1.84 (m, 1H), 1.75-1.53 (m, 1H), 1.42-1.17 (d, 3H).  $^{13}\text{C NMR}$  (101 MHz,  $\text{CDCl}_3$ )  $\delta$ = 144.79, 129.28, 126.70, 121.11, 116.98, 114.00, 47.18, 30.15, 26.62, 22.64.

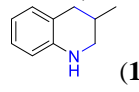

**(1c)**  $^1\text{H NMR}$  (400 MHz,  $\text{CDCl}_3$ )  $\delta$ = 7.07-6.92 (m, 2H), 6.83-6.67 (m, 1H), 6.60-6.38 (m, 1H), 3.85 (s, 1H), 3.48-3.08 (m, 1H), 3.10-2.91 (m, 1H), 2.87-2.73 (m, 1H), 2.55-2.36 (m, 1H), 2.21-1.99 (m, 1H), 1.17-0.98 (d, 3H).  $^{13}\text{C NMR}$  (101 MHz,  $\text{CDCl}_3$ )  $\delta$ = 144.40, 129.63, 126.80, 121.20, 117.01, 113.96, 48.96, 35.59, 27.30, 19.16.

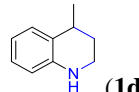

**(1d)**  $^1\text{H NMR}$  (400 MHz,  $\text{CDCl}_3$ )  $\delta$ = 7.13-6.91 (m, 2H), 6.72-6.43 (m, 2H), 3.90-3.59 (m, 1H), 3.52-3.19 (m, 2H), 2.99-2.79 (m, 1H), 2.14-1.94 (m, 1H), 1.80-1.64 (m, 1H), 1.41-1.28 (d, 3H).  $^{13}\text{C NMR}$  (101 MHz,  $\text{CDCl}_3$ )  $\delta$ = 144.15, 128.58, 126.86, 117.25, 114.42, 39.16, 30.34, 29.97, 22.76.

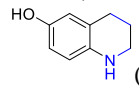

**(1e)**  $^1\text{H NMR}$  (400 MHz,  $\text{CDCl}_3$ )  $\delta$ = 6.66-6.29 (m, 3H), 3.91 (s, 1H), 3.31-3.13 (m, 2H), 2.91-2.64 (m, 2H), 2.01-1.87 (m, 2H).  $^{13}\text{C NMR}$  (101 MHz,  $\text{CDCl}_3$ )  $\delta$ = 123.67, 116.41, 116.15, 114.07, 42.53, 27.07, 22.51.

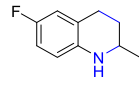

**(1f)**  $^1\text{H NMR}$  (400 MHz,  $\text{CDCl}_3$ )  $\delta$ = 6.88-6.57 (m, 2H), 6.50-6.29 (m, 1H), 3.55 (s, 1H), 3.45-3.28 (m, 1H), 2.92-2.63 (m, 2H), 1.98-1.87 (m, 1H), 1.68-1.49 (m, 1H), 1.35-1.11 (d, 3H).  $^{13}\text{C NMR}$  (101 MHz,  $\text{CDCl}_3$ )  $\delta$ = 156.67, 154.33, 140.99, 140.97, 129.05, 122.51, 122.44, 115.50, 115.28, 114.74, 114.67, 113.27, 113.04, 47.32, 29.90, 26.73, 22.51.

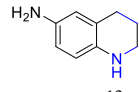

**(1g)**  $^1\text{H NMR}$  (400 MHz,  $\text{CDCl}_3$ )  $\delta$ = 6.74-6.11 (m, 3H), 3.67-2.85 (m, 5H), 2.84-2.65 (m, 2H), 2.01-1.84 (m, 2H).  $^{13}\text{C NMR}$  (101 MHz,  $\text{CDCl}_3$ )  $\delta$ = 117.03, 116.11, 114.81, 26.94, 22.64.

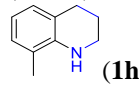

**(1h)**  $^1\text{H NMR}$  (400 MHz,  $\text{CDCl}_3$ )  $\delta$ = 7.06-6.72 (m, 2H), 6.72-6.39 (m, 1H), 3.63 (s, 1H), 3.51-3.29 (m, 2H), 2.91-2.74 (m, 2H), 2.10 (s, 3H), 2.08-1.88 (m, 2H).  $^{13}\text{C NMR}$  (101 MHz,  $\text{CDCl}_3$ )  $\delta$ = 142.72, 127.85, 127.38, 121.18, 120.87, 116.40, 42.37, 27.31, 22.19, 17.18.

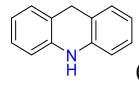

**(1i)**  $^1\text{H NMR}$  (400 MHz,  $\text{CDCl}_3$ )  $\delta$ = 7.18-7.04 (m, 4H), 6.99-6.67 (m, 2H), 6.87-6.51 (m, 2H), 5.95 (s, 1H), 4.09 (s, 2H).  $^{13}\text{C NMR}$  (101 MHz,  $\text{CDCl}_3$ )  $\delta$ = 140.25, 128.73, 127.12, 120.76, 120.17, 113.56, 31.52.

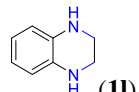

**(1l)**  $^1\text{H NMR}$  (400 MHz,  $\text{CDCl}_3$ )  $\delta$ = 6.81 – 6.44 (m, 4H), 3.63 (s, 2H), 3.41 (t, 4H).  $^{13}\text{C NMR}$  (101 MHz,  $\text{CDCl}_3$ )  $\delta$ = 133.69, 118.76, 114.71, 41.41.



 **(1m)** <sup>1</sup>H NMR (400 MHz, CDCl<sub>3</sub>) δ 7.14-6.84 (m, 4H), 3.93 (s, 2H), 3.06 (t, 2H), 2.72 (t, 2H), 1.79 (s, 1H). <sup>13</sup>C NMR (101 MHz, CDCl<sub>3</sub>) δ 136.07, 134.88, 129.42, 126.31, 126.11, 125.82, 48.44, 44.03, 29.30.

 **(1n)** <sup>1</sup>H NMR (400 MHz, CDCl<sub>3</sub>) δ= 7.23-7.01 (m, 1H), 7.13-6.94 (m, 1H), 6.77-6.62 (m, 2H), 3.84-3.60 (m, 1H), 3.71-3.48 (m, 2H), 3.24-2.91 (m, 2H). <sup>13</sup>C NMR (101 MHz, CDCl<sub>3</sub>) δ= 151.46, 129.52, 127.34, 124.77, 118.95, 109.72, 47.42, 29.96.

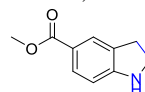 **(1p)** <sup>1</sup>H NMR (400 MHz, CDCl<sub>3</sub>) δ= 7.88-7.51 (m, 2H), 6.80-6.34 (m, 1H), 4.11 (s, 1H), 3.77 (s, 3H), 3.68-3.42 (m, 2H), 3.08-2.84 (m, 2H). <sup>13</sup>C NMR (101 MHz, CDCl<sub>3</sub>) δ= 167.47, 155.97, 130.70, 128.69, 126.13, 119.53, 107.37, 51.55, 47.28, 28.88.

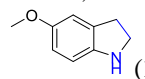 **(1q)** <sup>1</sup>H NMR (400 MHz, CDCl<sub>3</sub>) δ= 7.03-6.47 (m, 3H), 3.90-3.78 (m, 4H), 3.65-3.47 (m, 2H), 3.15-2.89 (m, 2H). <sup>13</sup>C NMR (101 MHz, CDCl<sub>3</sub>) δ= 153.80, 144.83, 131.36, 112.21, 111.57, 110.46, 56.00, 47.77, 30.46.

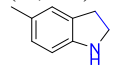 **(1r)** <sup>1</sup>H NMR (400 MHz, CDCl<sub>3</sub>) δ= 7.19-6.79 (m, 2H), 6.69-6.49 (m, 1H), 3.76-3.46 (m, 3H), 3.12-2.97 (m, 2H), 2.28 (s, 3H). <sup>13</sup>C NMR (101 MHz, CDCl<sub>3</sub>) δ= 149.14, 129.88, 128.29, 127.61, 125.54, 109.64, 47.66, 30.06, 20.90.

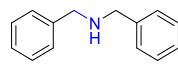 **(3a)** <sup>1</sup>H NMR (400 MHz, CDCl<sub>3</sub>) δ 7.32 – 7.12 (m, 10H), 3.74 (s, 4H), 1.67 (s, 1H). <sup>13</sup>C NMR (101 MHz, CDCl<sub>3</sub>) δ 128.54, 128.30, 127.10, 77.48, 77.16, 76.84, 53.28.

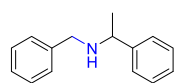 **(3b)** <sup>1</sup>H NMR (400 MHz, CDCl<sub>3</sub>) δ= 7.62-7.33 (m, 5H), 7.52-7.21 (m, 5H), 4.85-4.67 (m, 2H), 3.78-3.58 (m, 1H), 1.59-1.38 (d, 3H). <sup>13</sup>C NMR (101 MHz, CDCl<sub>3</sub>) δ= 128.78, 128.69, 128.50, 127.82, 127.46, 127.38, 127.03, 126.30, 57.55, 51.68, 23.79.

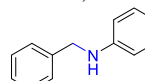 **(3c)** <sup>1</sup>H NMR (400 MHz, CDCl<sub>3</sub>) δ= 7.37-7.23 (m, 4H), 7.29-7.17 (m, 1H), 7.19-7.00 (s, 2H), 6.69-6.59 (m, 1H), 6.65-6.50 (m, 2H), 4.24 (s, 2H), 4.02 (s, 1H). <sup>13</sup>C NMR (101 MHz, CDCl<sub>3</sub>) δ= 148.23, 139.53, 129.39, 128.76, 127.65, 127.36, 117.72, 113.00, 48.47.

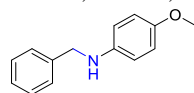 **(3d)** <sup>1</sup>H NMR (400 MHz, CDCl<sub>3</sub>) δ= 7.41-7.21 (m, 5H), 7.09-6.32 (m, 4H), 4.27 (s, 2H), 3.73 (s, 3H). <sup>13</sup>C NMR (101 MHz, CDCl<sub>3</sub>) δ= 152.22, 142.50, 139.73, 128.62, 127.57, 127.20, 114.94, 114.13, 55.84, 49.27.

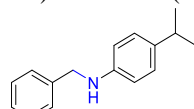 **(3e)** <sup>1</sup>H NMR (400 MHz, CDCl<sub>3</sub>) δ= 7.47-7.29 (m, 5H), 7.15-7.01 (m, 2H), 6.69-6.58 (m, 2H), 4.32 (s, 2H), 4.12 (s, 1H), 2.94 – 2.74 (m, 1H), 1.29-1.14 (d, 6H). <sup>13</sup>C NMR (101 MHz, CDCl<sub>3</sub>) δ= 146.20, 139.70, 138.40, 128.73, 127.74, 127.33, 127.26, 113.15, 48.92, 33.32, 24.39, 1.18.

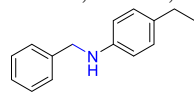 **(3f)** <sup>1</sup>H NMR (400 MHz, CDCl<sub>3</sub>) δ= 7.86-7.01 (m, 7H), 6.96-6.53 (m, 2H), 4.37 (s, 2H), 4.00 (s, 1H), 2.82-2.43 (m, 2H), 1.36-1.18 (m, 3H). <sup>13</sup>C NMR (101 MHz, CDCl<sub>3</sub>) δ= 145.50, 139.62, 128.70, 127.87, 127.59, 127.56, 127.27, 127.06, 117.39, 110.34, 48.40, 23.95, 12.92.

 **(3g)** <sup>1</sup>H NMR (400 MHz, CDCl<sub>3</sub>) δ= 7.49-7.21 (m, 4H), 7.35-7.28 (m, 1H), 4.94-4.81 (m, 1H), 1.59-1.41 (d, 3H). <sup>13</sup>C NMR (101 MHz, CDCl<sub>3</sub>) δ= 145.89, 128.43, 127.34, 125.44, 70.21, 25.13.

 **(3h)** <sup>1</sup>H NMR (400 MHz, CDCl<sub>3</sub>) δ= 7.40-7.05 (m, 5H), 4.61-4.48 (m, 1H), 1.79-1.61 (m, 2H), 0.93-1.74 (m, 3H). <sup>13</sup>C NMR (101 MHz, CDCl<sub>3</sub>) δ= 144.71, 128.50, 127.60, 127.58, 126.11, 126.09, 76.13, 31.99, 10.26.

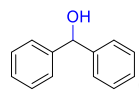

**(5i)**  $^1\text{H NMR}$  (400 MHz,  $\text{CDCl}_3$ )  $\delta$ = 7.82-7.19 (m, 10H), 5.81 (s, 1H), 2.28 (s, 1H).  $^{13}\text{C NMR}$  (101 MHz,  $\text{CDCl}_3$ )  $\delta$ = 143.92, 128.62, 127.69, 126.67, 76.38.

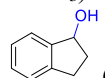

**(5j)**  $^1\text{H NMR}$  (400 MHz,  $\text{CDCl}_3$ )  $\delta$ = 7.56-7.18 (m, 4H), 5.41-5.19 (m, 1H), 3.19-2.98 (m, 1H), 2.93-2.72 (m, 1H), 2.66-2.34 (m, 1H), 2.00-1.81 (m, 1H).  $^{13}\text{C NMR}$  (101 MHz,  $\text{CDCl}_3$ )  $\delta$ = 145.10, 143.40, 128.39, 128.38, 126.79, 124.98, 124.30, 76.48, 36.01, 36.00, 29.89.
